# Supplementary material for: SO2 capture by 2-pyridineethanol through the formation of a zwitterionic liquid
Source: Royal Society of Chemistry journal article supplement (doi:10.1039/d2cc01722a), 2022-01-01
Supplement: d2cc01722a1.pdf [file d2cc01722a1.pdf]

Supporting information

**SO<sub>2</sub> capture by 2-pyridineethanol through the formation of a  
zwitterionic liquid**

Zonghua Wang, Dezhong Yang\*

School of Science, China University of Geosciences, Beijing 100083, China

Email: yangdz@cugb.edu.cn

## **Experimental Sections**

### **Materials and Characterizations**

2-PyEtOH (99%) was supplied by Alfa Aesar and it was dried by 4Å molecular sieve before use. SO<sub>2</sub> (≥ 99.9%) and N<sub>2</sub> (≥99.99%) were provided by Beijing ZG Special Gases Sci. and Tech. Co. Ltd. A Perkin-Elmer Frontier spectrometer with an attenuated total reflection (ATR) accessory was used to record the FTIR spectra. <sup>1</sup>H NMR (600 MHz) and <sup>13</sup>C NMR (151 MHz) spectra were recorded on a Bruker spectrometer using CDCl<sub>3</sub> as the internal solvent, and the chemical shifts values were referenced to TMS.

### **Absorption and desorption of SO<sub>2</sub>**

2-PyEtOH (~1.0 g) was added into a glass tube with a diameter of 10 mm, which was sealed with a rubber lid equipped with two needles. One needle was SO<sub>2</sub> outlet, and the other one was SO<sub>2</sub> inlet. The tube was partially immersed in a water bath at 20 °C. Then, SO<sub>2</sub> was bubbled into 2-PyEtOH in the tube at a flow rate of ~50 mL/min, which was controlled by a flowmeter. The weight of the tube was determined at regular time by an electronic balance with an accuracy of ±0.1 mg. The weight difference of the tube before and after SO<sub>2</sub> uptake was considered as the mass of SO<sub>2</sub> captured by the absorbent. In the low SO<sub>2</sub> partial pressure experiments, the pressure of SO<sub>2</sub> was obtained by tuning the flow rates of SO<sub>2</sub> and N<sub>2</sub>.

In the desorption process, the tube was placed in a water bath at 50 °C, and N<sub>2</sub> was bubbled through the solution at a flow rate of ~60 mL/min.

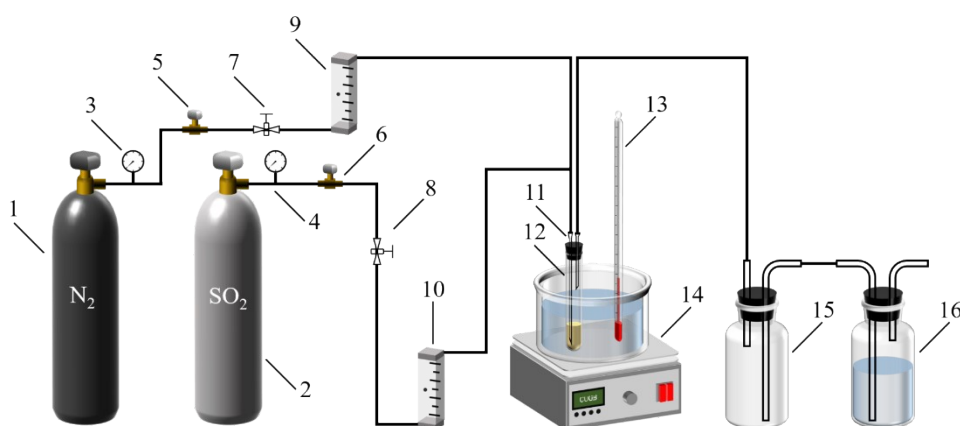

**Fig. S1** The schematic diagram of SO<sub>2</sub> absorption and desorption process by 2-PyEtOH. 1, 2 - Gas cylinders; 3, 4 - Pressure gauges; 5, 6 - Pressure reducing valves; 7, 8 - Needle valves; 9, 10 - Gas flowmeters; 11 - Needles; 12 - Tube; 13 - Thermometers; 14 - Water bath; 15 – Safety bottle; 16 - NaOH aqueous solution

**Table S1.** Comparison of 2-PyEtOH with DESs and ILs in SO<sub>2</sub> capacity and desorption temperature.

| Solvents                                                     | SO <sub>2</sub> capacity (g SO <sub>2</sub> /g solvent) |         | Desorption temperature /°C | References |
|--------------------------------------------------------------|---------------------------------------------------------|---------|----------------------------|------------|
|                                                              | T /°C                                                   | 1.0 atm |                            |            |
| 2-PyEtOH                                                     | 20                                                      | 1.16    | 50                         | This work  |
| BmimCl                                                       | 50                                                      | 0.75    | 140                        | 1          |
| [Emim][Cl][SCN] (1:1)                                        | 20                                                      | 1.22    | 120                        | 2          |
| [P <sub>66614</sub> ][4-CNC <sub>6</sub> H <sub>4</sub> COO] | 20                                                      | 0.40    | 120                        | 3          |
| [P <sub>66614</sub> ][4-Br-PhCOO]                            | 20                                                      | 0.39    | 120                        | 4          |
| [P <sub>66614</sub> ][4-Cl-PhCOO]                            | 20                                                      | 0.39    | 120                        | 4          |
| EmimCl-TEG (2:1)                                             | 20                                                      | 1.06    | 100                        | 5          |
| Bet-EG (1:3)                                                 | 40                                                      | 0.366   | 90                         | 6          |
| BmimCl-Im (2:1)                                              | 20                                                      | 1.32    | 80                         | 7          |
| BmimCl-EU (2:1)                                              | 20                                                      | 1.18    | 80                         | 8          |
| EmimCl-EG (2:1)                                              | 20                                                      | 1.15    | 80                         | 9          |
| EmimCl-SN (1:1)                                              | 20                                                      | 1.13    | 80                         | 10         |
| [Emim][SCN]                                                  | 20                                                      | 1.13    | 80                         | 11         |
| [Et <sub>2</sub> NEmim][Tetz]                                | 20                                                      | 1.10    | 80                         | 12         |
| [E <sub>3</sub> mim][Tetz]                                   | 20                                                      | 0.95    | 80                         | 13         |
| EmimCl-TEG (1:1)                                             | 20                                                      | 0.91    | 80                         | 5          |
| [C <sub>10</sub> mim][Tetz]                                  | 20                                                      | 0.74    | 80                         | 13         |
| [P <sub>66614</sub> ][Tetz]                                  | 20                                                      | 0.43    | 80                         | 14         |
| [Na(TX-10)][SCN]                                             | 20                                                      | 0.422   | 80                         | 15         |
| PPZBr-Gly (1:6)                                              | 20                                                      | 0.35    | 80                         | 16         |

## References

- 1 K. Y. Lee, C. S. Kim, H. Kim, M. Cheong, D. K. Mukherjee and K. D. Jung, *Bull. Korean Chem. Soc.*, 2010, **31**, 1937-1940.
- 2 D. Yang, G. Cui and M. Lv, *Energy Fuels*, 2018, **32**, 10796-10800.
- 3 G. Cui, F. Zhang, X. Zhou, H. Li, J. Wang and C. Wang, *Chem. Eur. J.*, 2015, **21**, 5632-5639.
- 4 G. K. Cui, J. J. Zheng, X. Y. Luo, W. J. Lin, F. Ding, H. R. Li and C. M. Wang, *Angew. Chem. Int. Ed.*, 2013, **52**, 10620-10624.
- 5 D. Yang, S. Zhang, D.-e. Jiang and S. Dai, *Phys. Chem. Chem. Phys.*, 2018, **20**, 15168-15173.
- 6 K. Zhang, S. Ren, Y. Hou and W. Wu, *J. Hazard. Mater.*, 2017, **324**, 457-463.
- 7 Y. Chen, B. Jiang, H. Dou, L. Zhang, X. Tantai, Y. Sun and H. Zhang, *Energy Fuels*, 2018, **32**, 10737-10744.
- 8 B. Jiang, H. Zhang, L. Zhang, N. Zhang, Z. Huang, Y. Chen, Y. Sun and X. Tantai, *ACS Sustainable Chem. Eng.*, 2019, **7** 8347-8357.
- 9 D. Yang, Y. Han, H. Qi, Y. Wang and S. Dai, *ACS Sustainable Chem. Eng.*, 2017, **5**, 6382-6386.
- 10 D. Yang, S. Zhang and D.-e. Jiang, *ACS Sustainable Chem. Eng.*, 2019, **7** 9086-9091.
- 11 C. M. Wang, J. J. Zheng, G. K. Cui, X. Y. Luo, Y. Guo and H. R. Li, *Chem. Commun.*, 2013, **49**, 1166-1168.
- 12 D. Z. Yang, M. Q. Hou, H. Ning, J. Ma, X. C. Kang, J. L. Zhang and B. X. Han, *ChemSusChem*, 2013, **6**, 1191-1195.
- 13 G. K. Cui, C. M. Wang, J. J. Zheng, Y. Guo, X. Y. Luo and H. R. Li, *Chem. Commun.*, 2012, **48**, 2633-2635.
- 14 C. M. Wang, G. K. Cui, X. Y. Luo, Y. J. Xu, H. R. Li and S. Dai, *J. Am. Chem. Soc.*, 2011, **133**, 11916-11919.
- 15 F. Ding, J. J. Zheng, Y. Q. Chen, K. H. Chen, G. K. Cui, H. R. Li and C. M. Wang, *Ind. Eng. Chem. Res.*, 2014, **53**, 18568-18574.
- 16 G. Cui, J. Liu, S. Lyu, H. Wang, Z. Li and J. Wang, *ACS Sustainable Chem. Eng.*, 2019, **7**, 14236-14246.
